# Supplementary material for: The IGCP 714 Project “3GEO – Geoclimbing & Geotrekking in Geoparks” – Selection of Geodiversity Sites Equipped for Climbing for Combining Outdoor and Multimedia Activities
Source: Springer Nature journal article supplement (doi:10.1007/s12371-024-00976-4), 2024-07-19

# LEGEND

## SITES

- Geoclimbing
- △ Geotrekking
- ☆ Geoclimbing & Geotrekking

## TECTONIC BOUNDARIES

- Ridge
- Trench
- Transform

## LITHOLOGIES

- |                       |                           |
|-----------------------|---------------------------|
| Plutonic Acid         | Ice                       |
| Plutonic Basic        | Water                     |
| Plutonic Intermediate | Evaporites                |
| Volcanic Acid         | Pyroclastites             |
| Volcanic Basic        | Carbonate Sedimentary     |
| Volcanic Intermediate | Mixed Sedimentary         |
| Metamorphic           | Siliciclastic Sedimentary |
| Not Defined           | Unconsolidated Sediments  |

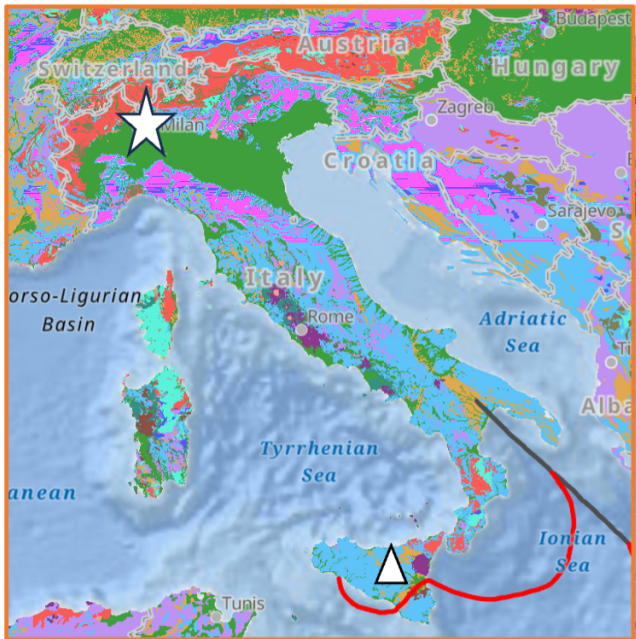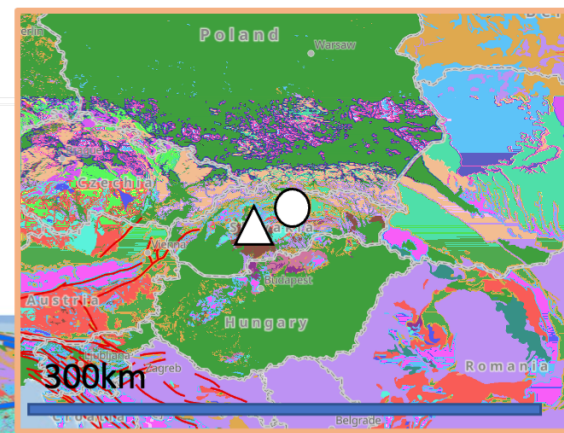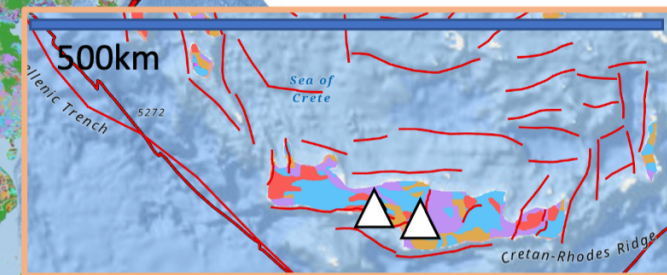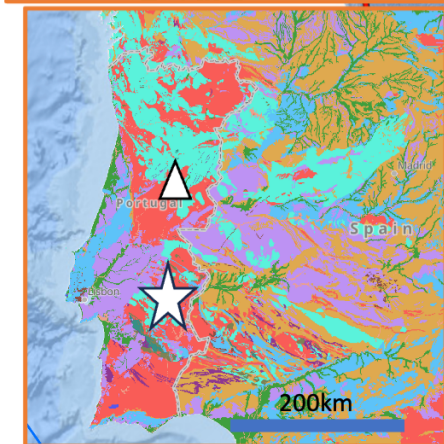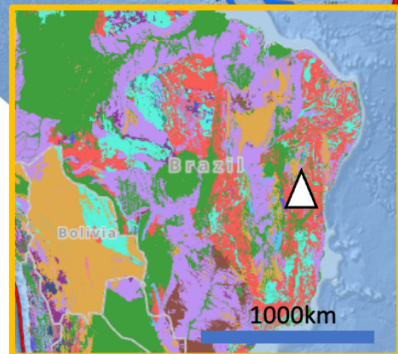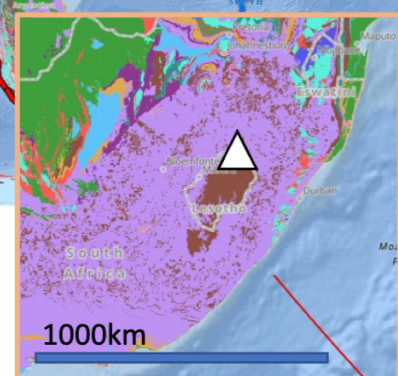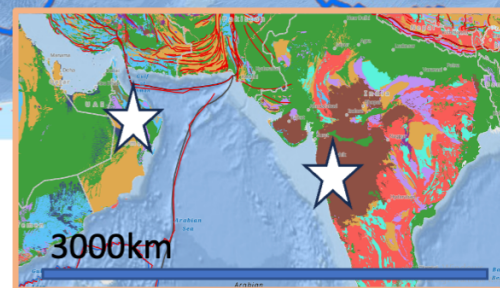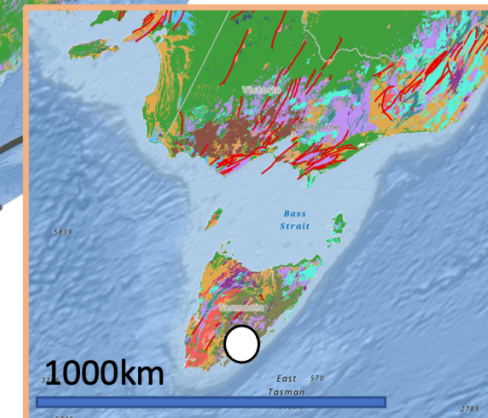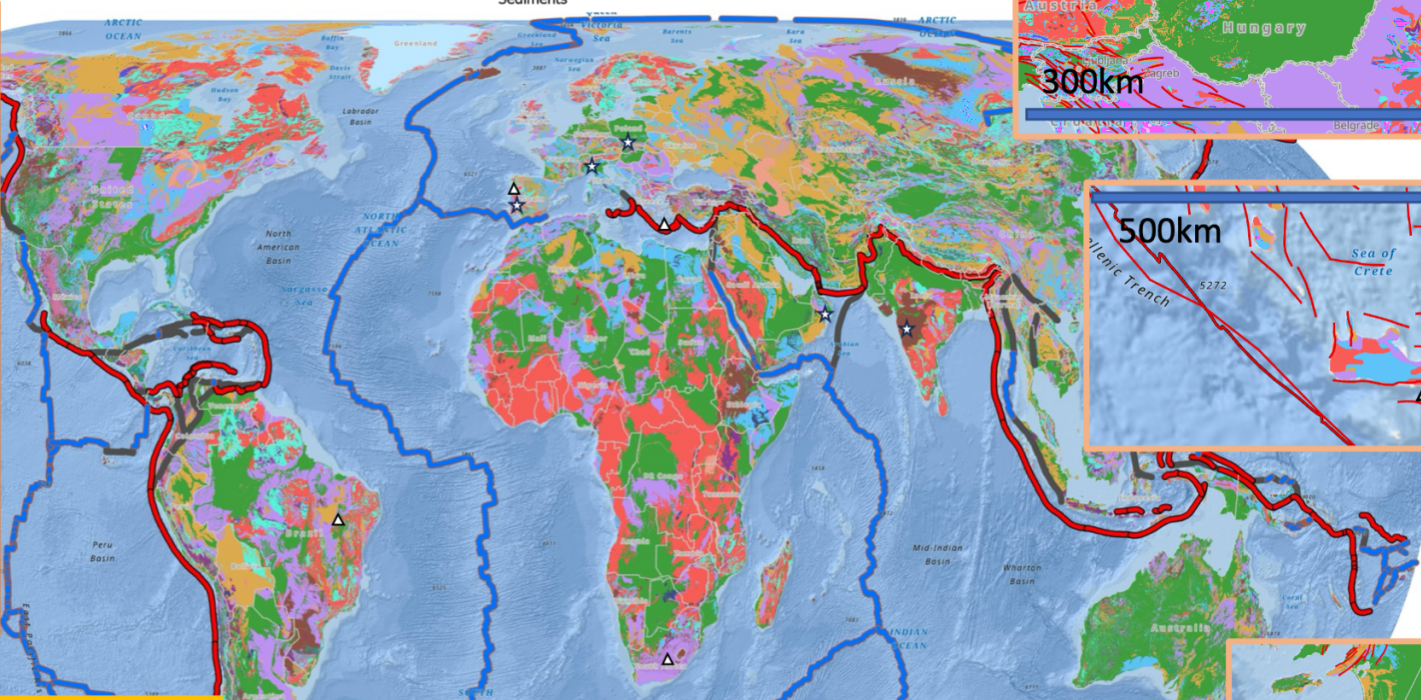

Supplement: MOESM1 [file 12371_2024_976_MOESM1_ESM.pdf]
