# Supplementary material for: The IGCP 714 Project “3GEO – Geoclimbing & Geotrekking in Geoparks” – Selection of Geodiversity Sites Equipped for Climbing for Combining Outdoor and Multimedia Activities
Source: Springer Nature journal article supplement (doi:10.1007/s12371-024-00976-4), 2024-07-19
Supplement: MOESM3 [file 12371_2024_976_MOESM3_ESM.pdf]

**SELECTED STUDY SITES (modified from Bollati et al., 2016)**

|                                                                   |      |
|-------------------------------------------------------------------|------|
|                                                                   | 0.00 |
| <i>RGmP-Representativeness of (paleo)Geomorphological Process</i> | 0.33 |
|                                                                   | 0.67 |
|                                                                   | 1.00 |
|                                                                   | 0.00 |
| <i>RG-Representativeness of Geological process</i>                | 0.33 |
|                                                                   | 0.67 |
|                                                                   | 1.00 |
|                                                                   | 0.00 |
| <i>EE-Educational Exemplarity</i>                                 | 0.33 |
|                                                                   | 0.67 |
|                                                                   | 1.00 |
|                                                                   | 0.00 |
| <i>G-Site Intrinsic Geodiversity</i>                              | 0.50 |
|                                                                   | 1.00 |
|                                                                   | 0.00 |
| <i>GI-Geohistorical Importance</i>                                | 0.33 |
|                                                                   | 0.67 |
|                                                                   | 1.00 |
|                                                                   | 0.00 |
| <i>ESR-Ecologic support role</i>                                  | 0.33 |
|                                                                   | 0.67 |
|                                                                   | 1.00 |
|                                                                   | 0.00 |
| <i>In-Integrity</i>                                               | 0.50 |
|                                                                   | 1.00 |
|                                                                   | 0.00 |
| <i>Ra-Rareness</i>                                                | 0.50 |
|                                                                   | 1.00 |
|                                                                   | 0.00 |
|                                                                   | 0.00 |
| <i>Cu-Cultural value s.s.</i>                                     | 0.50 |
|                                                                   | 1.00 |
|                                                                   | 0.00 |
| <i>Ae-Aesthetic value</i>                                         | 0.50 |
|                                                                   | 1.00 |
|                                                                   | 0.00 |
| <i>Sec-Socio-Economic value</i>                                   | 0.33 |
|                                                                   | 0.67 |
|                                                                   | 1.00 |
|                                                                   | 0.00 |
| <i>TA-Temporal Accessibility</i>                                  | 0.50 |
|                                                                   | 1.00 |
|                                                                   | 0.20 |
|                                                                   | 0.40 |

|                                                                         |                                  |      |
|-------------------------------------------------------------------------|----------------------------------|------|
| <b>VALUES OF THE SE</b>                                                 | <i>Sac-Spatial Accessibility</i> | 0.60 |
|                                                                         |                                  | 0.80 |
|                                                                         |                                  | 1.00 |
|                                                                         | <i>Vi-Visibility</i>             | 0.00 |
|                                                                         |                                  | 0.20 |
|                                                                         |                                  | 0.40 |
|                                                                         |                                  | 0.60 |
|                                                                         |                                  | 0.80 |
|                                                                         |                                  | 1.00 |
|                                                                         | <i>Se-Services</i>               | 0.00 |
| 0.33                                                                    |                                  |      |
| 0.67                                                                    |                                  |      |
| 1.00                                                                    |                                  |      |
| <i>TF-Touristic Flow</i>                                                | 0.00                             |      |
|                                                                         | 0.50                             |      |
|                                                                         | 1.00                             |      |
| <i>SA-Sport Activities at the geosite(e.g., climbing, trekking....)</i> | 0.00                             |      |
|                                                                         | 0.50                             |      |
|                                                                         | 1.00                             |      |
| <i>LC-Legal Constraints</i>                                             | 0.00                             |      |
|                                                                         | 0.33                             |      |
|                                                                         | 0.67                             |      |
|                                                                         | 1.00                             |      |
| <i>UGI-Use as Geoh heritage site</i>                                    | 0.00                             |      |
|                                                                         | 0.50                             |      |
|                                                                         | 1.00                             |      |
| <i>UAI-Use of the other interests(cultural, ecologic...)</i>            | 0.00                             |      |
|                                                                         | 0.50                             |      |
|                                                                         | 1.00                             |      |
| <i>SGs-Geo(morpho)sites in the Surroundings</i>                         | 0.00                             |      |
|                                                                         | 0.50                             |      |
|                                                                         | 1.00                             |      |
| <b>REFERENC</b>                                                         |                                  |      |

## CRITERIA OF SELECTION

### Scientific Value

Poor/None representativeness of a morphogenetic system

Discrete representativeness of a morphogenetic system

Good representativeness of a morphogenetic system

Exemplar representativeness of a morphogenetic system

Poor/None representativeness of a geological process

Discrete representativeness of a geological process

Good representativeness of a geological process

Exemplar representativeness of a geological process

Representativeness without any educational value

Representativeness with poor educational value

Representativeness for high education level

Representativeness with excellent educational value

1 lithology, 1 main landform

1 lithology, n-landforms

n- lithologies, n-landforms

Without any publication

Rarely object of scientific research

Relevant topic for scientific research

Deeply investigated since fundamental for the development of Earth Sciences

Without any connection with the biologic element

Ecological value for presence of interesting flora and fauna

The geo(morpho)logical features condition the ecosystems

The geo(morpho)logical features determine the ecosystems

Essential geo(morphological) elements are not preserved

Essential geo(morpho)logical elements are just preserved

Essential geo(morpho)logical elements are intact

Frequent also at level of the study area

Rare at level of the study area, abundant at national level

Rare at national level

### Additional Values

Any cultural feature in the surroundings

Presence of cultural features not correlated with geo(morpho)logical features

Presence of cultural features correlated with geo(morpho)logical features

Not relevant

Strong contrasts in landforms, lithologies and colours but spatially limited site

Strong contrasts in landforms, lithologies and colours

Element without exploitation or insertion in an economic area (Not touristic)

Element with exploitation or insertion in an economic area (Not touristic)

Element inserted in an economic-touristic area

Element inserted in an economic-touristic circuit

### Potential for use

Except in unfavourable conditions (e.g., winter, rainy days...)

All over the year

On foot, Expert Excursionist

On foot, Touristic/Excursionist

|                                                                 |
|-----------------------------------------------------------------|
| On foot for numerous group, because difficult access for bus    |
| Allowed to means of transportation                              |
| Allowed to means of transportation, access also to disables     |
| Not observable or great difficulties in observing it            |
| Just visible or with special tools (artificial lights, ropes..) |
| Reasonable visibility but limited by vegetation                 |
| Good visibility but with need of moving to improve it           |
| Good visibility for all geo(morpho)logical elements             |
| Excellent visibility for all geo(morpho)logical elements        |
| Hotels and services far from 25 Km                              |
| Hotels and services far from 10 - 25 Km                         |
| Hotels and services far from 5 - 10 Km                          |
| Hotels and services less than 5 Km far from                     |
| Few                                                             |
| Medium                                                          |
| Abundant                                                        |
| None                                                            |
| Yes, not correlated with geo(morpho)logical features            |
| Yes, correlated with geo(morpho)logical features                |
| Total protection, prevented use                                 |
| Protection, limited use                                         |
| Under protection but with few or any prevention for use         |
| No protection or limitation in use                              |
| No divulgation or use                                           |
| Use in academic ambit                                           |
| With divulgation and use as geo(morpho)site                     |
| Any divulgation or use                                          |
| Use of other interests, but not structured in thematic paths    |
| Use of other interests structured in thematic paths             |
| Any sites in the study area                                     |
| Sites in the neighbourhood but not genetically correlated       |
| Sites in the neighbourhood and genetically correlated           |
| <b>TOTAL SCORE</b>                                              |
| <b>ES ABOUT ASSESSMENT OF THE STUDY SITE</b>                    |

| GC-1               | GC-2     | GC-3                    |
|--------------------|----------|-------------------------|
| Premia Balmafregia | Zornasco | Ornavasso (Im Schlasti) |
| 5.67               | 6.51     | 5.68                    |
|                    |          |                         |
|                    |          | 0.67                    |
| 1                  | 1        |                         |
|                    |          |                         |
|                    |          |                         |
| 1                  | 1        | 1                       |
|                    |          |                         |
|                    | 0.67     | 0.67                    |
| 1                  |          |                         |
|                    |          |                         |
| 1                  | 1        | 1                       |
|                    |          |                         |
|                    |          |                         |
| 0.67               | 0.67     | 0.67                    |
|                    |          |                         |
| 0                  |          |                         |
|                    |          |                         |
|                    | 0.67     | 0.67                    |
|                    |          |                         |
|                    |          | 0.5                     |
| 1                  | 1        |                         |
| 0                  |          |                         |
|                    | 0.5      | 0.5                     |
|                    |          |                         |
| 2                  | 2        | 2                       |
| 0                  | 0        |                         |
|                    |          | 1                       |
|                    |          | 0                       |
|                    |          |                         |
| 1                  | 1        |                         |
|                    |          |                         |
|                    |          |                         |
| 1                  | 1        | 1                       |
| 8.3                | 8.67     | 7.2                     |
| 0.5                |          | 0.5                     |
|                    | 1        |                         |
|                    |          |                         |
|                    |          | 0.4                     |

|                                        |                                        |                                        |
|----------------------------------------|----------------------------------------|----------------------------------------|
|                                        |                                        |                                        |
| 0.8                                    | 1                                      |                                        |
|                                        |                                        |                                        |
|                                        |                                        |                                        |
|                                        |                                        |                                        |
|                                        |                                        | 0.8                                    |
| 1                                      | 1                                      |                                        |
|                                        |                                        |                                        |
|                                        |                                        |                                        |
| 1                                      | 1                                      | 1                                      |
|                                        |                                        |                                        |
|                                        | 0.5                                    | 0.5                                    |
| 1                                      |                                        |                                        |
|                                        |                                        |                                        |
|                                        |                                        |                                        |
| 1                                      | 1                                      | 1                                      |
|                                        |                                        |                                        |
|                                        |                                        |                                        |
|                                        | 0.67                                   |                                        |
| 1                                      |                                        | 1                                      |
|                                        |                                        | 0                                      |
|                                        |                                        |                                        |
| 1                                      | 1                                      |                                        |
| 0                                      |                                        |                                        |
|                                        | 0.5                                    |                                        |
|                                        |                                        | 1                                      |
|                                        |                                        |                                        |
|                                        |                                        |                                        |
| 1                                      | 1                                      | 1                                      |
| <b>15.97</b>                           | <b>17.18</b>                           | <b>14.88</b>                           |
| Modified from<br>Bollati et al. (2016) | Modified from<br>Bollati et al. (2024) | Modified from<br>Bollati et al. (2016) |

| GC-4                    | GC-5         | GC-6  | GC-7                | GC-8 |
|-------------------------|--------------|-------|---------------------|------|
| Mottarone climbing area | Fun d'Scotte | Ronco | Torre delle Giavine | Ara  |
| 5.84                    | 3            | 2.33  | 5.5                 | 6    |
|                         |              | 0.33  |                     |      |
|                         | 0.67         |       |                     |      |
| 1                       |              |       | 1                   | 1    |
|                         |              |       |                     |      |
|                         | 0.67         | 0.67  |                     |      |
| 1                       |              |       | 1                   | 1    |
|                         |              |       |                     |      |
|                         | 0.33         | 0.33  |                     |      |
|                         |              |       | 0.67                |      |
| 1                       |              |       |                     | 1    |
|                         |              | 0     |                     |      |
| 0.5                     | 0.5          |       | 0.5                 | 0.5  |
|                         |              |       |                     |      |
|                         |              | 0     |                     |      |
|                         | 0.33         |       | 0.33                | 0.33 |
| 0.67                    |              |       |                     |      |
|                         |              |       |                     |      |
|                         | 0            | 0     | 0                   |      |
|                         |              |       |                     |      |
| 0.67                    |              |       |                     | 0.67 |
|                         |              |       |                     |      |
|                         | 0.5          | 0.5   |                     |      |
| 1                       |              |       | 1                   | 1    |
| 0                       | 0            |       |                     |      |
|                         |              | 0.5   |                     | 0.5  |
|                         |              |       | 1                   |      |
| 2                       | 1.67         | 1.67  | 2.67                | 2.67 |
| 0                       |              | 0     |                     |      |
|                         | 0.5          |       |                     |      |
|                         |              |       | 1                   | 1    |
|                         |              |       |                     |      |
|                         | 0.5          |       |                     |      |
| 1                       |              | 1     | 1                   | 1    |
|                         |              |       |                     |      |
|                         |              |       |                     |      |
|                         | 0.67         | 0.67  | 0.67                | 0.67 |
| 1                       |              |       |                     |      |
| 5.9                     | 7            | 6     | 7.9                 | 8.5  |
| 0.5                     | 0.5          | 0.5   | 0.5                 | 0.5  |
|                         |              |       |                     |      |
|                         |              |       |                     |      |
| 0.4                     | 0.4          | 0.4   | 0.4                 | 0.4  |

|                                        |                        |                  |                       |                          |
|----------------------------------------|------------------------|------------------|-----------------------|--------------------------|
|                                        |                        |                  |                       |                          |
|                                        |                        |                  |                       |                          |
|                                        |                        |                  |                       |                          |
|                                        |                        |                  |                       |                          |
|                                        | 0.6                    | 0.6              |                       | 0.6                      |
| 1                                      |                        |                  | 1                     |                          |
|                                        |                        |                  |                       |                          |
|                                        |                        |                  |                       |                          |
| 1                                      | 1                      | 1                | 1                     | 1                        |
|                                        |                        |                  |                       |                          |
|                                        |                        | 0.5              | 0.5                   |                          |
| 1                                      | 1                      |                  |                       | 1                        |
|                                        |                        |                  |                       |                          |
|                                        |                        |                  |                       |                          |
| 1                                      | 1                      | 1                | 1                     | 1                        |
|                                        |                        |                  |                       |                          |
|                                        |                        |                  |                       |                          |
| 1                                      | 1                      | 1                | 1                     | 1                        |
| 0                                      | 0                      | 0                |                       |                          |
|                                        |                        |                  |                       |                          |
|                                        |                        |                  | 1                     | 1                        |
| 0                                      |                        | 0                |                       |                          |
|                                        | 0.5                    |                  | 0.5                   |                          |
|                                        |                        |                  |                       | 1                        |
| 0                                      |                        |                  |                       |                          |
|                                        |                        |                  |                       |                          |
|                                        |                        |                  |                       |                          |
|                                        | 1                      | 1                | 1                     | 1                        |
| <b>13.74</b>                           | <b>11.67</b>           | <b>10</b>        | <b>16.07</b>          | <b>17.17</b>             |
| Modified from<br>Bollati et al. (2016) | Viani et al.<br>(2018) | Original<br>data | Perotti et al. (2020) | Perotti et<br>al. (2020) |



| GEOCLIMBING SITES |              |                 |                  |
|-------------------|--------------|-----------------|------------------|
| GC-9              | GC-10        | GC-11           | GC-12            |
| Pietra Romanasca  | Montestrutto | Sasso del Drago | Voulismeno Aloni |
| 3.84              | 6.17         | 4.5             | 5.67             |
|                   |              |                 |                  |
| 0.67              |              | 0.67            |                  |
|                   | 1            |                 | 1                |
|                   |              |                 | 0.33             |
| 0.67              |              | 0.67            |                  |
|                   | 1            |                 |                  |
|                   |              | 0.33            |                  |
|                   | 0.67         |                 |                  |
| 1                 |              |                 | 1                |
| 0                 |              |                 | 0                |
|                   | 0.5          |                 |                  |
|                   |              | 1               |                  |
| 0                 |              |                 |                  |
|                   |              | 0.33            |                  |
|                   |              |                 | 0.67             |
|                   | 1            |                 |                  |
| 0                 | 0            | 0               |                  |
|                   |              |                 | 0.67             |
|                   |              |                 |                  |
| 1                 | 1            | 1               | 1                |
|                   |              |                 |                  |
| 0.5               |              | 0.5             |                  |
|                   | 1            |                 | 1                |
| 2.17              | 3            | 1.17            | 2.67             |
|                   |              | 0               |                  |
| 0.5               |              |                 |                  |
|                   | 1            |                 | 1                |
|                   |              |                 |                  |
|                   |              | 0.5             |                  |
| 1                 | 1            |                 | 1                |
|                   |              |                 |                  |
| 0.67              |              | 0.67            | 0.67             |
|                   | 1            |                 |                  |
| 5.5               | 9.1          | 6.6             | 8.27             |
| 0.5               |              |                 |                  |
|                   | 1            | 1               | 1                |
|                   |              |                 |                  |
| 0.4               |              |                 |                  |

|               |                                        |               |               |
|---------------|----------------------------------------|---------------|---------------|
|               |                                        |               |               |
|               |                                        |               | 0.8           |
|               | 1                                      | 1             |               |
|               |                                        |               |               |
|               |                                        |               |               |
| 0.6           | 0.6                                    | 0.6           |               |
|               |                                        |               | 0.8           |
|               |                                        |               |               |
|               |                                        |               |               |
| 1             | 1                                      | 1             | 1             |
|               |                                        |               |               |
| 0.5           |                                        | 0.5           | 0.5           |
|               | 1                                      |               |               |
|               |                                        |               |               |
|               |                                        |               |               |
| 1             | 1                                      | 1             | 1             |
|               |                                        |               |               |
|               |                                        |               | 0.67          |
| 1             | 1                                      | 1             |               |
| 0             |                                        | 0             |               |
|               | 0.5                                    |               |               |
|               |                                        |               | 1             |
| 0             |                                        |               |               |
|               |                                        |               | 0.5           |
|               | 1                                      |               |               |
|               |                                        |               |               |
| 0.5           |                                        | 0.5           |               |
|               | 1                                      |               | 1             |
| <b>11.51</b>  | <b>18.27</b>                           | <b>12.27</b>  | <b>16.61</b>  |
| Original data | Modified from<br>Bollati et al. (2014) | Original data | Original data |

| GC-13        | GC-14                    | GC-15    | GC-16         |
|--------------|--------------------------|----------|---------------|
| Patsos gorge | La Pedriza de Manzanares | Peñalara | Kramnica Rock |
| 3.83         | 6.34                     | 6.51     | 4.01          |
|              |                          |          |               |
| 0.67         | 1                        | 0.67     | 0.67          |
|              |                          |          |               |
| 0.33         |                          |          | 0.33          |
|              |                          | 0.67     |               |
|              | 1                        |          |               |
| 0.33         |                          |          |               |
|              |                          |          | 0.67          |
|              | 1                        | 1        |               |
|              |                          |          | 0             |
| 0.5          | 0.5                      |          |               |
|              |                          | 1        |               |
| 0            |                          |          |               |
|              | 0.67                     | 0.67     | 0.67          |
|              |                          |          |               |
|              | 0.67                     |          | 0.67          |
| 1            |                          | 1        |               |
|              |                          |          | 0.5           |
| 1            | 1                        | 1        |               |
| 0            |                          |          |               |
|              | 0.5                      | 0.5      | 0.5           |
|              |                          |          |               |
| 2.5          | 2                        | 2.17     | 2.17          |
|              |                          |          |               |
| 0.5          | 0.5                      |          | 0.5           |
|              |                          | 1        |               |
|              |                          |          |               |
|              | 0.5                      | 0.5      |               |
| 1            |                          |          | 1             |
|              |                          |          |               |
|              |                          | 0.67     | 0.67          |
| 1            | 1                        |          |               |
| 7.93         | 8.23                     | 7.56     | 7.2           |
|              |                          |          |               |
| 1            | 1                        | 1        | 1             |
|              |                          |          |               |
|              | 0.4                      | 0.4      | 0.4           |

|               |                          |                          |               |
|---------------|--------------------------|--------------------------|---------------|
|               |                          |                          |               |
| 0.8           |                          |                          |               |
|               |                          |                          |               |
|               |                          |                          |               |
|               |                          |                          |               |
| 0.8           |                          |                          | 0.8           |
|               | 1                        | 1                        |               |
| 0.33          |                          | 0.33                     |               |
|               | 1                        |                          | 0.67          |
|               |                          |                          |               |
|               |                          |                          | 0.5           |
| 1             | 1                        | 1                        |               |
|               |                          |                          |               |
| 1             | 1                        | 1                        | 1             |
|               |                          |                          |               |
|               | 0.33                     | 0.33                     | 0.33          |
| 1             |                          |                          |               |
|               |                          |                          |               |
|               |                          |                          | 0.5           |
| 1             | 1                        | 1                        |               |
|               |                          |                          |               |
| 1             | 1                        | 1                        | 1             |
| 0             |                          |                          |               |
|               | 0.5                      | 0.5                      |               |
|               |                          |                          | 1             |
| <b>14.26</b>  | <b>16.57</b>             | <b>16.24</b>             | <b>13.38</b>  |
| Original data | de Pedraza et al. (2014) | de Pedraza et al. (2019) | Original data |

| GC-17                    | GC-18 | GC-19                        | GC-20           |
|--------------------------|-------|------------------------------|-----------------|
| Dreveník travertine hill | Mnich | Między Ściany rock formation | Sab Bani Khamis |
| 6.84                     | 5.34  | 4.17                         | 6.84            |
|                          |       |                              |                 |
|                          |       | 0.67                         |                 |
| 1                        | 1     |                              | 1               |
|                          |       |                              |                 |
|                          |       | 0.33                         |                 |
|                          | 0.67  |                              |                 |
| 1                        |       |                              | 1               |
|                          |       |                              |                 |
| 0.67                     | 0.67  | 0.67                         |                 |
|                          |       |                              | 1               |
|                          | 0.5   | 0.5                          |                 |
| 1                        |       |                              | 1               |
|                          |       |                              |                 |
|                          |       | 0.33                         |                 |
| 0.67                     |       |                              | 0.67            |
|                          | 1     |                              |                 |
|                          | 0     |                              |                 |
|                          |       |                              |                 |
|                          |       | 0.67                         | 0.67            |
| 1                        |       |                              |                 |
|                          | 0.5   | 0.5                          |                 |
| 1                        |       |                              | 1               |
|                          |       |                              |                 |
| 0.5                      |       | 0.5                          | 0.5             |
|                          | 1     |                              |                 |
| 2.17                     | 2.67  | 1.67                         | 3               |
|                          |       |                              |                 |
| 0.5                      |       | 0.5                          |                 |
|                          | 1     |                              | 1               |
|                          |       |                              |                 |
|                          |       | 0.5                          |                 |
| 1                        | 1     |                              | 1               |
|                          |       |                              |                 |
|                          |       |                              |                 |
| 0.67                     | 0.67  | 0.67                         |                 |
|                          |       |                              | 1               |
| 7.9                      | 4.86  | 6.53                         | 7.4             |
|                          | 0.5   |                              |                 |
| 1                        |       | 1                            | 1               |
|                          | 0.2   |                              |                 |
| 0.4                      |       |                              | 0.4             |

|               |               |               |                                      |
|---------------|---------------|---------------|--------------------------------------|
|               |               | 0.6           |                                      |
|               |               |               |                                      |
|               |               |               |                                      |
|               |               |               |                                      |
|               |               | 0.6           |                                      |
| 1             | 1             |               | 1                                    |
|               | 0.33          |               |                                      |
| 0.67          |               |               |                                      |
|               |               | 1             | 1                                    |
|               | 0             |               |                                      |
| 0.5           |               | 0.5           | 0.5                                  |
|               |               |               |                                      |
|               |               |               |                                      |
| 1             | 1             | 1             | 1                                    |
| 0.33          | 0.33          | 0.33          |                                      |
|               |               |               |                                      |
|               |               |               | 1                                    |
|               | 0.5           | 0.5           |                                      |
| 1             |               |               |                                      |
|               | 0.5           | 0.5           | 0.5                                  |
| 1             |               |               |                                      |
|               | 0.5           | 0.5           |                                      |
| 1             |               |               | 1                                    |
| <b>16.91</b>  | <b>12.87</b>  | <b>12.37</b>  | <b>17.24</b>                         |
| Original data | Original data | Original data | Modified from Al Kindi et al. (2022) |

| GC-21      | GC-22           | N° GC sites | % GC sites |
|------------|-----------------|-------------|------------|
| Tail Bails | The Organ Pipes |             |            |
| 6.17       | 6.01            |             |            |
|            |                 | 0           | 0.00       |
|            |                 | 1           | 4.55       |
|            |                 | 8           | 36.36      |
| 1          | 1               | 13          | 59.09      |
|            |                 | 0           | 0.00       |
|            |                 | 4           | 18.18      |
|            |                 | 6           | 27.27      |
| 1          | 1               | 12          | 54.55      |
|            |                 | 0           | 0.00       |
|            |                 | 4           | 18.18      |
| 0.67       | 0.67            | 10          | 45.45      |
|            |                 | 8           | 36.36      |
|            |                 | 4           | 18.18      |
| 0.5        | 0.5             | 11          | 50.00      |
|            |                 | 7           | 31.82      |
|            |                 | 3           | 13.64      |
| 0.33       |                 | 6           | 27.27      |
|            | 0.67            | 11          | 50.00      |
|            |                 | 2           | 9.09       |
|            |                 | 8           | 36.36      |
|            |                 | 0           | 0.00       |
| 0.67       | 0.67            | 11          | 50.00      |
|            |                 | 3           | 13.64      |
|            |                 | 0           | 0.00       |
|            |                 | 6           | 27.27      |
| 1          | 1               | 16          | 72.73      |
|            |                 | 4           | 18.18      |
|            | 0.5             | 13          | 59.09      |
| 1          |                 | 5           | 22.73      |
| 1.17       | 3               |             |            |
|            |                 | 5           | 22.73      |
| 0.5        |                 | 8           | 36.36      |
|            | 1               | 9           | 40.91      |
| 0          |                 | 2           | 9.09       |
|            |                 | 5           | 22.73      |
|            | 1               | 15          | 68.18      |
|            |                 | 0           | 0.00       |
|            |                 | 0           | 0.00       |
| 0.67       |                 | 13          | 59.09      |
|            | 1               | 9           | 40.91      |
| 7.57       | 6.6             |             |            |
| 0.5        | 0.5             | 11          | 50.00      |
|            |                 | 11          | 50.00      |
|            |                 | 1           | 4.55       |
| 0.4        |                 | 13          | 59.09      |

|               |                                           |    |        |  |
|---------------|-------------------------------------------|----|--------|--|
|               | 0.6                                       | 2  | 9.09   |  |
|               |                                           | 3  | 13.64  |  |
|               |                                           | 3  | 13.64  |  |
|               |                                           | 0  |        |  |
|               |                                           | 0  | 0.00   |  |
|               |                                           | 0  | 0.00   |  |
|               |                                           | 7  | 31.82  |  |
|               |                                           | 4  | 18.18  |  |
| 1             | 1                                         | 11 | 50.00  |  |
|               |                                           | 0  | 0.00   |  |
|               | 0.33                                      | 4  | 18.18  |  |
| 0.67          |                                           | 3  | 13.64  |  |
|               |                                           | 15 | 68.18  |  |
|               |                                           | 1  | 4.55   |  |
| 0.5           | 0.5                                       | 13 | 59.09  |  |
|               |                                           | 8  | 36.36  |  |
|               |                                           | 0  | 0.00   |  |
|               |                                           | 0  | 0.00   |  |
| 1             | 1                                         | 22 | 100.00 |  |
|               |                                           | 0  | 0.00   |  |
|               |                                           | 6  | 27.27  |  |
|               | 0.67                                      | 3  | 13.64  |  |
| 1             |                                           | 13 | 59.09  |  |
|               |                                           | 6  | 27.27  |  |
|               | 0.5                                       | 5  | 22.73  |  |
| 1             |                                           | 11 | 50.00  |  |
|               |                                           | 4  | 18.18  |  |
| 0.5           | 0.5                                       | 9  | 40.91  |  |
|               |                                           | 9  | 40.91  |  |
|               |                                           | 2  | 9.09   |  |
|               |                                           | 6  | 27.27  |  |
| 1             | 1                                         | 14 | 63.64  |  |
| <b>14.91</b>  | <b>15.61</b>                              |    |        |  |
| Original data | Modified from Williams and McHenry (2021) |    |        |  |



| <b>SITE</b>              | <b>GC-1</b>  | <b>GC-2</b>  | <b>GC-3</b>  | <b>GC-4</b>  | <b>GC-5</b>  | <b>GC-6</b>  | <b>GC-7</b>  | <b>GC-8</b>  |
|--------------------------|--------------|--------------|--------------|--------------|--------------|--------------|--------------|--------------|
| <b>Scientific Value</b>  | 5.67         | 6.51         | 5.68         | 5.84         | 3            | 2.33         | 5.5          | 6            |
| <b>Additional Values</b> | 2            | 2            | 2            | 2            | 1.67         | 1.67         | 2.67         | 2.67         |
| <b>Potential for use</b> | 8.3          | 8.67         | 7.2          | 5.9          | 7            | 6            | 7.9          | 8.5          |
| <b>TOTAL SCORE</b>       | <b>15.97</b> | <b>17.18</b> | <b>14.88</b> | <b>13.74</b> | <b>11.67</b> | <b>10</b>    | <b>16.07</b> | <b>17.17</b> |
| <b>SITE</b>              | <b>GC-12</b> | <b>GC-13</b> | <b>GC-14</b> | <b>GC-15</b> | <b>GC-16</b> | <b>GC-17</b> | <b>GC-18</b> | <b>GC-19</b> |
| <b>Scientific Value</b>  | 5.67         | 3.83         | 6.34         | 6.51         | 4.01         | 6.84         | 5.34         | 4.17         |
| <b>Additional Values</b> | 2.67         | 2.5          | 2            | 2.17         | 2.17         | 2.17         | 2.67         | 1.67         |
| <b>Potential for use</b> | 8.27         | 7.93         | 8.23         | 7.56         | 7.2          | 7.9          | 4.86         | 6.53         |
| <b>TOTAL SCORE</b>       | <b>16.61</b> | <b>14.26</b> | <b>16.57</b> | <b>16.24</b> | <b>13.38</b> | <b>16.91</b> | <b>12.87</b> | <b>12.37</b> |

| <b>GC-9</b>  | <b>GC-10</b> | <b>GC-11</b> | <b>VALUE</b>             | <b>Potential maximum value</b> | <b>Average (GC-1-GC-22)</b> | <b>Average (modified Bollati et al., 2016)</b> |
|--------------|--------------|--------------|--------------------------|--------------------------------|-----------------------------|------------------------------------------------|
| 3.84         | 6.17         | 4.5          | <b>Scientific Value</b>  | <b>8</b>                       | <b>5.31</b>                 | <b>4.61</b>                                    |
| 2.17         | 3            | 1.17         |                          |                                |                             |                                                |
| 5.5          | 9.1          | 6.6          | <b>Additional Values</b> | <b>3</b>                       | <b>2.19</b>                 | <b>1.23</b>                                    |
| <b>11.51</b> | <b>18.27</b> | <b>12.27</b> |                          |                                |                             |                                                |
| <b>GC-20</b> | <b>GC-21</b> | <b>GC-22</b> | <b>Potential for use</b> | <b>10</b>                      | <b>7.31</b>                 | <b>6.55</b>                                    |
| 6.84         | 6.17         | 6.01         |                          |                                |                             |                                                |
| 3            | 1.17         | 3            | <b>TOTAL SCORE</b>       | <b>21</b>                      | <b>14.80</b>                | <b>12.39</b>                                   |
| 7.4          | 7.57         | 6.6          |                          |                                |                             |                                                |
| <b>17.24</b> | <b>14.91</b> | <b>15.61</b> |                          |                                |                             |                                                |
